# Supplementary material for: Isotopic 18O/16O substitution study on the direct partial oxidation of CH4 to dimethyl ether over a Pt/Y2O3 catalyst using NO/O2 as an oxidant
Source: Royal Society of Chemistry journal article supplement (doi:10.1039/d1cy00253h), 2021-01-01
Supplement: d1cy00253h1.pdf [file d1cy00253h1.pdf]

Isotopic  $^{18}\text{O}/^{16}\text{O}$  Substitution Study on the Direct Partial Oxidation of  $\text{CH}_4$  to  
Dimethyl Ether over a  $\text{Pt}/\text{Y}_2\text{O}_3$  Catalyst Using  $\text{NO}/\text{O}_2$  as an Oxidant

I. Tyrone Ghampson<sup>b,c</sup>, Sean-Thomas B. Lundin<sup>c</sup>, Tetsuya Shishido<sup>b</sup>, S. Ted Oyama<sup>a,c,d\*</sup>

<sup>a</sup>School of Chemical Engineering, Fuzhou University, Fuzhou 350116, China

<sup>b</sup>Department of Applied Chemistry for Environment, Graduate School of Urban Environmental  
Sciences, Tokyo Metropolitan University, 1-1 Minami-Osawa, Hachioji, Tokyo 192-0397, Japan

<sup>c</sup>Department of Chemical System Engineering, The University of Tokyo, 7-3-1 Hongo,  
Bunkyo-ku, Tokyo 113-8656, Japan

<sup>d</sup>Department of Chemical Engineering, Virginia Tech, Blacksburg, VA 24061, United States

\*Corresponding author.

E-mail address: oyama@vt.edu (S. Ted Oyama)

## 1. Experimental

The Pt/Y<sub>2</sub>O<sub>3</sub> catalyst was prepared by incipient wetness impregnation of an aqueous solution of hexachloroplatinic acid hexahydrate (H<sub>2</sub>PtCl<sub>6</sub>·6H<sub>2</sub>O, Wako, 98.5%) on yttrium (III) oxide (Y<sub>2</sub>O<sub>3</sub>, Nippon Yttrium, 99.9%). Quantities of reagents were used to give a loading of 2 wt% Pt/Y<sub>2</sub>O<sub>3</sub>, corresponding to a Pt concentration of 0.10 mmol g<sup>-1</sup> Y<sub>2</sub>O<sub>3</sub>. The sample was dried at 110 °C for 12 h and calcined at 400 °C for 3 h in an open air furnace. The catalyst was reduced at 400 °C for 2 h in flowing H<sub>2</sub> and passivated at room temperature for 2 h under 0.2% O<sub>2</sub>/He before BET surface area analysis (using a Micromeritics ASAP 2020 micropore size analyzer at 77 K) and TEM measurement (using a Topcon EM-002B high-resolution analytical electron microscope operated at 120 kV). The sample was reduced in the same manner prior to total dynamic CO uptake measurement (performed by passing pulses of 3% CO in He over the sample at 50 °C using a TPD-1-AT BEL instrument and monitoring the mass signal (m/z = 28) by a quadrupole mass spectrometer).

Isotopic substitution pulse measurements were conducted on the Pt/Y<sub>2</sub>O<sub>3</sub> catalyst using a catalyst analyzer (BELCAT II, MicrotracBEL Corp) equipped with a quadrupole mass spectrometer (BELMASS). The gases used were methane (99.999%), 5% nitric oxide in helium (certified mixture), helium (99.998%), hydrogen (99.999%), oxygen (>99.99%), and isotopically labeled oxygen-18 (>99 at%). Gases were purchased from Tokyo Koatsu Yamazaki Co. Ltd, except <sup>18</sup>O<sub>2</sub> which was obtained from Isotec® (Sigma Aldrich). Prior to the measurement, the catalyst (100 mg) was treated at 400 °C for 2 h in H<sub>2</sub> flow (100 cm<sup>3</sup> min<sup>-1</sup> or 68 μmol s<sup>-1</sup>), cooled to 325 °C in He flow (30 cm<sup>3</sup> min<sup>-1</sup> or 20 μmol s<sup>-1</sup>), and then held at 325 °C for 30 min. A reaction gas mixture (20% CH<sub>4</sub>, 1% NO, 1% O<sub>2</sub> and 78% He), which was previously used for steady-state reactivity studies<sup>1</sup>, was then introduced at a total flow rate of 100

cm<sup>3</sup> min<sup>-1</sup> or 68 μmol s<sup>-1</sup>. After 2 h of stabilization under this condition the O<sub>2</sub> flow was replaced with He, and the system was maintained until the mass spectrometer (MS) signals of the effluent streams were stable. Then, <sup>16</sup>O<sub>2</sub> was premixed with He and 36 μmol pulses of the mixture (5% <sup>16</sup>O<sub>2</sub>/He) were injected at 6 min intervals until no changes in the effluent streams were observed. The sample loop was then purged by flushing with pulses of He for 20 min. This sequence was then repeated with pulses of <sup>18</sup>O<sub>2</sub> premixed with He (5% <sup>18</sup>O<sub>2</sub>/He) and then with the 5% <sup>16</sup>O<sub>2</sub>/He. The areas for the MS peaks of the observed products were compared with the areas from calibrated pulses of CO<sub>2</sub> and DME.

## 2. Estimation of metal dispersion and particle size

The metal dispersion ( $D$ ) is defined as the fraction of total Pt atoms at the surface. It is calculated from CO chemisorption measurements by assuming an adsorption stoichiometry of CO/Pt = 1 using eqn. 1:

$$D = \frac{N_{CO} \times n}{\frac{M_L}{MW_{Pt}}} \quad (1)$$

In this equation,  $N_{CO}$  is the CO uptake after accounting for CO uptake on bare Y<sub>2</sub>O<sub>3</sub> (2 μmol g<sup>-1</sup>),  $n$  is the chemisorption stoichiometry (assumed to be 1),  $M_L$  is the metal loading (2 g Pt per g<sub>catalyst</sub>), and  $MW_{Pt}$  is the atomic weight of Pt (195.08 g mol<sup>-1</sup>).

$$D = \frac{(96 \mu\text{mol/g}) \times 1}{\frac{2}{(195.08 \text{ g/mol})}} = 94\%$$

The particle size ( $D_p$ ) was also calculated from the CO uptake value by assuming uniform spherical particles using eqn. 2:

$$D_p(nm) = \frac{6 \times 10^{23} \times n_s \times M_L}{\rho \times N_A \times n \times N_{CO}} \quad (2)$$

In this equation,  $n_s$  is the surface metal atom density (Pt =  $1.2 \times 10^{15}$  atoms per  $\text{cm}^2$ ),  $\rho$  is the density of bulk metal (Pt =  $21.4 \text{ g cm}^{-3}$ ), and  $N_A$  is Avogadro's number ( $6.02 \times 10^{23}$  atoms  $\text{mol}^{-1}$ ).

$$D_p = \frac{6 \times 10^{23} \times (1.2 \times 10^{15}) \times 2}{21.4 \times 6.02 \times 10^{23} \times 1 \times 96}$$

$$D_p = 1.2 \text{ nm}$$

### 3. Steady-state DME productivity

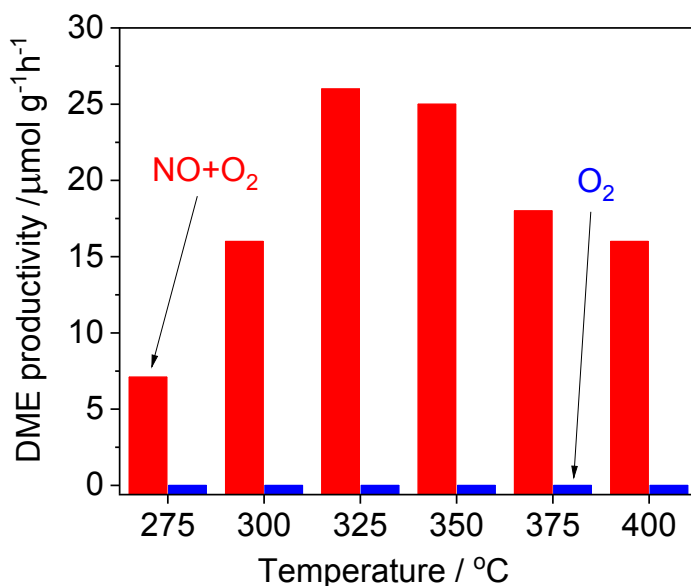

Fig. S1. DME production rate as a function of temperature with and without NO during  $\text{CH}_4$  partial oxidation by  $\text{NO}+\text{O}_2$ . The y-axis is displaced to more clearly show zero DME formation with only  $\text{O}_2$ . Conditions: 100 mg of catalyst with  $\text{NO}/\text{O}_2$  ( $\text{CH}_4:\text{NO}:\text{O}_2:\text{inert} = 20:1:1:78$ ) and  $\text{O}_2$  ( $\text{CH}_4:\text{O}_2:\text{inert} = 20:1:79$ ) as oxidants at 0.1 MPa.

Fig. S1 shows the DME production rate as a function of temperature with and without NO.

The measurements were conducted in a tubular quartz reactor at atmospheric pressure, a GHSV of  $1200 \text{ h}^{-1}$ , and temperatures of  $275 \text{ }^\circ\text{C}$  to  $400 \text{ }^\circ\text{C}$ . The DME production rate went

through a maximum at 325 °C and decreased at higher temperatures, which was attributed to overoxidation.

#### 4. Gas phase oxidation of NO to NO<sub>2</sub>

The oxidation of NO to NO<sub>2</sub> in the gas phase has been reported to follow mainly two mechanisms. The first involves the formation of an NO dimer intermediate:<sup>2-4</sup>

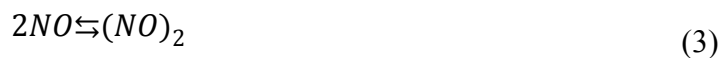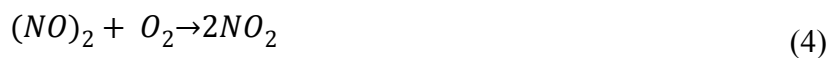

The second is with NO<sub>3</sub> and N<sub>2</sub>O<sub>4</sub> as intermediates:

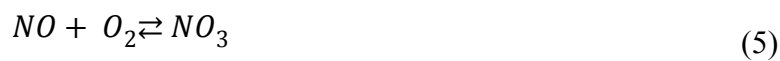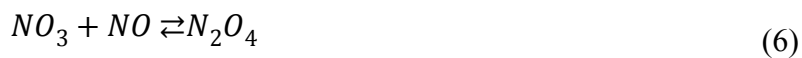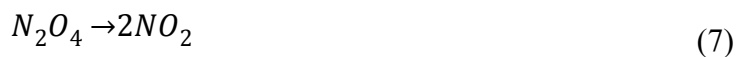

The video below demonstrates the rapid transformation of NO to NO<sub>2</sub> upon exposure to air at room temperature.

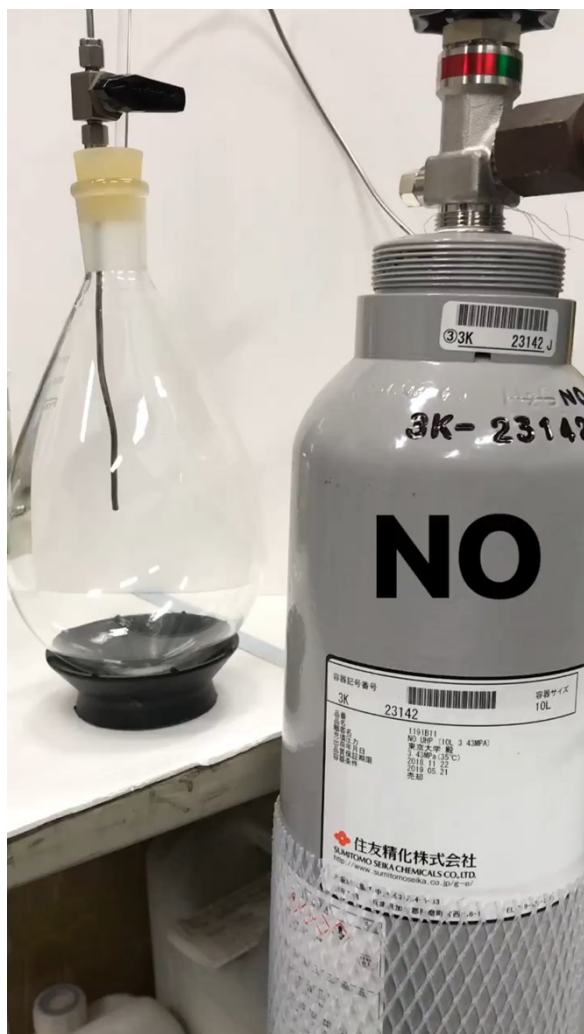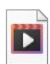

Media1.mov

## 5. A single oxygen transfer system

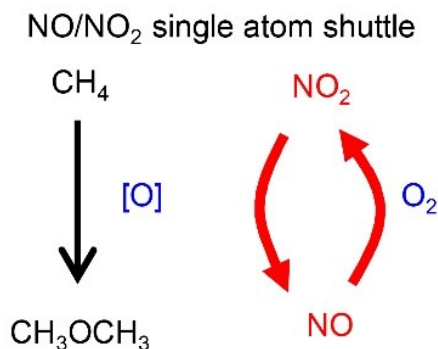

Fig. S2. Schematic of DME formation during CH<sub>4</sub> partial oxidation by NO+O<sub>2</sub>

The steady-state DME productivity with NO + O<sub>2</sub> shown earlier (Fig. S1) was achieved without reduction of NO/NO<sub>2</sub> to N<sub>2</sub>. This means that NO/NO<sub>2</sub> acted as an oxygen atom shuttle to oxidize methane using a single atom of oxygen [O] derived from O<sub>2</sub>, as illustrated in Fig. S2. The single oxygen atom is subsequently transferred during the partial oxidation.

## 6. Thermodynamics

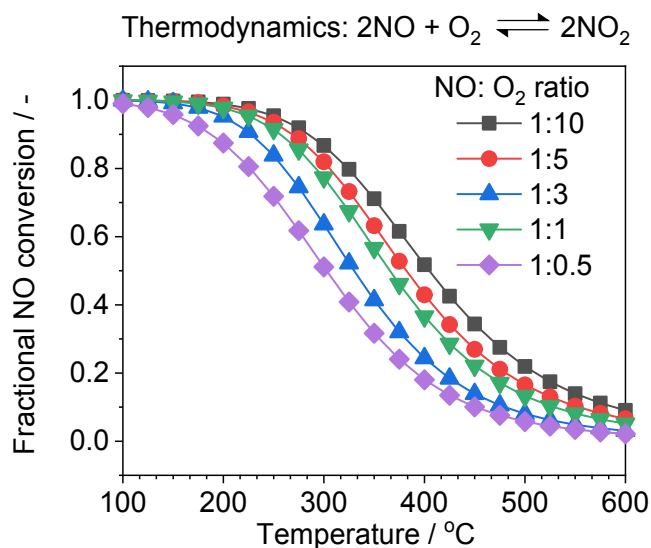

Figure S3. NO conversion as a function of temperature for different mixture ratios of NO and O<sub>2</sub> at 0.1 MPa.

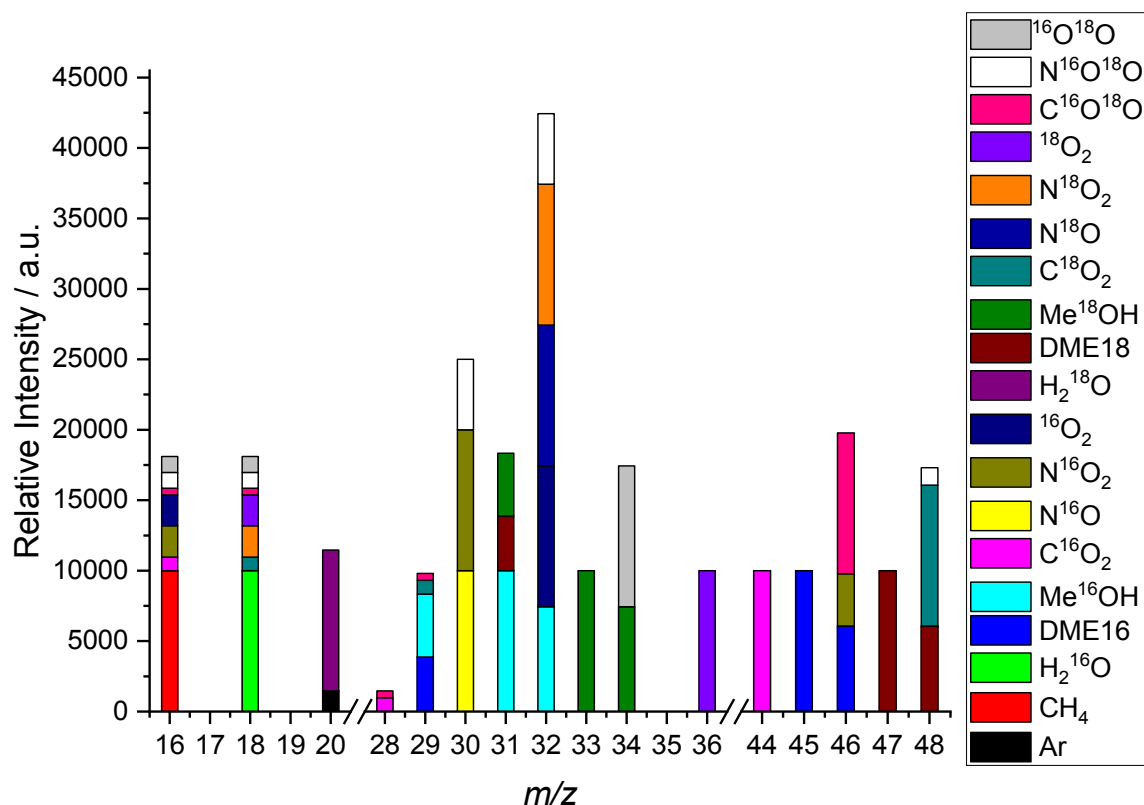

Figure S4. Expected contributions to each peak intensity in the MS signals ( $\text{N}_2$ ,  $\text{N}_2\text{O}$ ,  $\text{HCHO}$  and  $\text{CO}$  have been omitted).

## 7. Derivation of kinetic isotope effect

The relative rate for the reaction of isotopes was derived from the partition functions and statistical mechanics. The rate constants are given by eqn. 8:

$$k = \frac{k_b T Q^\#}{h Q} e^{-E/RT} \quad (8)$$

Here,  $k_b T/h$  is the universal frequency,  $Q^\#$  is the partition function of the activated complex,  $Q$  is the partition function of the reactant, and  $E$  is the activation energy.

For oxygen isotopes the difference in the zero-point energies is very small, so the activation energies are nearly equal. This means that only the difference in the partition functions is



relevant. Assuming a simple representation of only the movement along the reaction coordinate, a one-dimensional translational partition function is used. This results in eqn. 9 expression:

$$\frac{Q^\ddagger}{Q} = \frac{1}{\sqrt{2\pi M k_b T}} \quad (9)$$

where  $M$  is the mass of the molecule. The only difference in the partition functions of oxygen isotopes is the mass, resulting in an inverse square root dependence on mass of the isotope:

$$\frac{k_{18}}{k_{16}} = \sqrt{\frac{M_{16}}{M_{18}}} \quad (10)$$

1. V. Vargheese, J. Murakami, K. K. Bando, I. T. Ghampson, G.-N. Yun, Y. Kobayashi and S. T. Oyama, The direct molecular oxygen partial oxidation of CH<sub>4</sub> to dimethyl ether without methanol formation over a Pt/Y<sub>2</sub>O<sub>3</sub> catalyst using an NO/NO<sub>2</sub> oxygen atom shuttle, *J. Catal.*, 2020, **389**, 352-365.
2. E. Neyrolles, J. Lara Cruz, G. Bassil, F. Contamine, P. Cezac and P. Arpentinier, Kinetic study of the nitric oxide oxidation between 288 and 323 K, under pressure, focus on the oxygen influence on the reaction rate constant, *Int. J. Chem. Kinet.*, 2020, **52**, 329-340.
3. N. Artioli, R. F. Lobo and E. Iglesia, Catalysis by confinement: Enthalpic stabilization of NO oxidation transition states by microporous and mesoporous siliceous materials, *J. Phys. Chem. C*, 2013, **117**, 20666-20674.
4. J. Olbregts, Termolecular reaction of nitrogen monoxide and oxygen: A still unsolved problem, *Int. J. Chem. Kinet.*, 1985, **17**, 835-848.
